# Supplementary material for: Mediators of neutrophil recruitment in human abdominal aortic aneurysms
Source: PubMed Central journal article supplement — Cardiovasc Res. 2009 Feb 5;82(3):532–41. doi: 10.1093/cvr/cvp048 (PMC2682614; doi:10.1093/cvr/cvp048), 2009-02-05
Supplement: cvp048_1.pdf [file cvp048_1.pdf]

**Table. Intra- and inter-assay coefficients of variation (%) for each ELISA.**

|                                                             |             | <b>Intra-assay</b> | <b>Inter-assay</b> |
|-------------------------------------------------------------|-------------|--------------------|--------------------|
| <b>Elastase/<math>\alpha_1</math>-antitrypsin complexes</b> |             | 6.6                | 9.4                |
| <b>MPO</b>                                                  |             | 8.3                | 8.8                |
| <b>MMP-9/NGAL complexes</b>                                 |             | 3.8                | 7.9                |
| <b><math>\alpha</math>-defensins</b>                        |             | 7.6                | 7.7                |
| <b>RANTES</b>                                               |             | 8.8                | 9.2                |
| <b>PF4</b>                                                  |             | 6.8                | 9.5                |
| <b>IL-8</b>                                                 | R&D systems | 6                  | 7.8                |
|                                                             | Sanquin     | 7.4                | 10.8               |
